# Supplementary material for: uc.454 Inhibited Growth by Targeting Heat Shock Protein Family A Member 12B in Non-Small-Cell Lung Cancer
Source: PubMed Central journal article supplement — Mol Ther Nucleic Acids. 2018 May 29;12:174–83. doi: 10.1016/j.omtn.2018.05.004 (PMC6023848; doi:10.1016/j.omtn.2018.05.004), 2018-05-29
Supplement: mmc1.pdf [file mmc1.pdf]

**OMTN, Volume 12**

**Supplemental Information**

**uc.454 Inhibited Growth by Targeting Heat**

**Shock Protein Family A Member 12B**

**in Non-Small-Cell Lung Cancer**

**Jun Zhou, Chenghai Wang, Weijuan Gong, Yandan Wu, Huimin Xue, Zewei Jiang, and Minhua Shi**

**Table S1. Sequence of primers and siRNA.**

| <b>Gene Name</b> | <b>Forward(5'-3')</b>   | <b>Reverse (5'-3')</b>  |
|------------------|-------------------------|-------------------------|
| TUCR.454         | TAAAGACAGGATGGCTCGAGC   | AGTGAACCTACCTCGGTAGTTCC |
| si- TUCR.454-1   | GAUGGCUCGAGCAGGGGCCAA   | UUGGCCCCUGCUCGAGCCAUC   |
| si- TUCR.454-2   | CCAUGAUCACGGCAUCGGGAA   | UUCCCGAUGCCGUGAUCAUGG   |
| si- TUCR.454-3   | TAGTTCACTATTTGACAGCTTAA | UUAAGCUGUCAAAUAGUGAACUA |
| HSPA12B          | CACGGATCTCACCTTGAAGA    | GACACTAGTCCAGCCAGGTA    |
| si- HSPA12B 1    | CCACUGAUCGUUACCUUGAA    | UUCAAGGUAAGAUCAGUGG     |
| si- HSPA12B -2   | CUUCAUUGACUUCUACCGCAA   | UUGCGGUAGAAGUCAAUGAAG   |
| U6               | CAGAGCCCATCGCTGCCAGAGAA | TTCACGAATTTGCGTGTCAT    |
| GAPDH            | GAAGGTGAAGGTCGGAGTC     | GAAGATGGTGATGGGATTTC    |

Figure S1

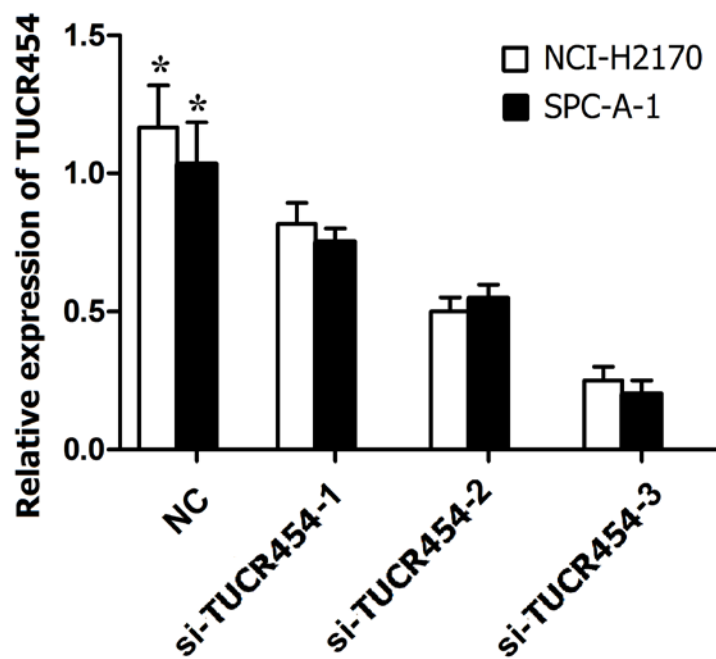

Table S2: Characteristics of the study subjects with non-small cell lung cancer (NSCLC)

| Clinicopathologic features | Number | Percentage (%) |
|----------------------------|--------|----------------|
| Age (years)                |        |                |
| <60                        | 33     | 33.7           |
| ≥60                        | 65     | 66.3           |
| Tumor size (cm)            |        |                |
| <5                         | 28     | 28.6           |
| ≥5                         | 70     | 71.4           |
| Tumor site                 |        |                |
| central                    | 55     | 56.1           |
| peripheral                 | 43     | 43.9           |
| Pathological type          |        |                |
| squamous-cell carcinoma    | 54     | 55.1           |
| adenocarcinoma             | 44     | 44.9           |
| Pathological grade         |        |                |
| I                          | 19     | 19.4           |
| II                         | 9      | 9.2            |
| III                        | 70     | 71.4           |
| Tumor invasive depth       |        |                |
| T1+T2                      | 52     | 53.1           |
| T3+T4                      | 46     | 46.9           |
| lymph node metastasis      |        |                |
| negative                   | 36     | 36.7           |
| positive                   | 62     | 63.3           |

Distant metastasis

M0 41 41.8

M1 57 58.2

Tumor stage

I 11 11.2

II 26 26.5

III 31 31.6

IV 30 30.7

Survival time

≥5 years 52 53.1

<5 years 42 42.9

unknown 4 4.0

---
